# Supplementary material for: A standardized database of MIS 5e sea-level proxies in southern Africa (Angola, Namibia and South Africa)
Source: Copernicus journal article supplement (doi:10.5194/essd-2020-166), 2020-08-25
Supplement: Supplementary file 1 [file database submitted.xlsx]

## Sheet: South Africa
WALIS RSL ID	Nation	Site	Subsite	Latitude (decimal degrees)	Longitude (decimal degrees)	Type of RSL datapoint	Type of RSL Indicator	RSL indicator elevation (m)	RSL indicator elevation error (m)	Paleo Relative Sea Level (m)	Paleo Relative Sea Level uncertainty (m)	Dating technique	Originally reported ID	Analysis ID	Dated material	Timing constraint	Reported age (ka)	Reported age uncertainty (ka)	MIS constraint	Marine Isotopic Stage	References	Record Created by
356	South Africa	Swartvlei	Estuary mouth 1	-34.0325	22.7978	Sea Level Indicator	Tidal inlet facies	6.5	2	8.5	2.5	Luminescence	UoW-234	001	OSL	Equal to	127.00	5.70	Equal to	MIS 5	Carr et al., 2010	Andrew Cooper
358	South Africa	Swartvlei	Swartvlei estuary mouth 2	-34.0325	22.7978	Sea Level Indicator	Tidal inlet facies	4.5	0.1	6.5	1.5	Luminescence	SHFD07072	CA10-001-001	OSL		130.00	8.20	Equal to	MIS 5	Carr et al., 2010	Andrew Cooper
359	South Africa	Groot Brak Estuary Mouth		-34.0561	22.2406	Sea Level Indicator	Beach swash deposit	9	1	7.25	1.03	Luminescence	UOW-232	001	OSL	Equal to	125.00	6.70	Equal to	MIS 5	Carr et al., 2010	Andrew Cooper
360	South Africa	Cape Agulhas		-34.8172	20.0275	Sea Level Indicator	Foreshore deposits	5.6	0.1	5.6	3	Luminescence	SHFD05019	001	OSL	Equal to	118.00	7.20	Equal to	MIS 5	Carr et al., 2010	Andrew Cooper
361	South Africa	Swartvlei	Swartvlei Estuary Mouth 3	-34.0325	22.7977	Sea Level Indicator	Tidal inlet facies	0.5	0.1	2	2	Luminescence	SHFD04288	001	OSL	Equal to	138.00	7.30	Equal to	MIS 5	Carr et al., 2010	Andrew Cooper
362	South Africa	Swartvlei	Swartvlei Estuary Mouth 4	-34.0325	22.7977	Terrestrial Limiting	The datapoint is a marine or terrestrial limiting indicator	11.7	0.1	11.7	0.1	Luminescence	SHFD05038	001	OSL	Equal to	112.00	5.10	Equal to	MIS 5	Carr et al., 2010	Andrew Cooper
363	South Africa	Swartvlei	Swartvlei Estuary mouth 5	-34.0325	22.7978	Terrestrial Limiting	The datapoint is a marine or terrestrial limiting indicator	6.5	0.1	6.5	0.1	Luminescence	UOW-235	001	OSL	Equal to	113.00	5.60	Equal to	MIS 5	Carr et al., 2010	Andrew Cooper
364	South Africa	Groot Brak Estuary Mouth	Groot Brak Estuary Mouth	-34.0561	22.2405	Terrestrial Limiting	The datapoint is a marine or terrestrial limiting indicator	10.5	0.1	10.5	0.1	Luminescence	UOW-233	001	OSL	Equal to	122.00	6.90	Equal to	MIS 5	Carr et al., 2010	Andrew Cooper
365	South Africa	Nahoon Point	Footprints site	-32.9947	27.95	Terrestrial Limiting	The datapoint is a marine or terrestrial limiting indicator	4.5	0.1	4.5	0.1	Luminescence	NN1	001	OSL	Equal to	124.80	5.20	Equal to	MIS 5	Jacobs and Roberts, 2009	Andrew Cooper
366	South Africa	Nahoon Point	East Beach	-33.006	27.9313	Sea Level Indicator	Beach deposit or beachrock	4.25	1.75	4.25	1.82	Luminescence	NHN1	001	OSL	Equal to	117.30	6.20	Equal to	MIS 5	Jacobs and Roberts, 2009	Andrew Cooper
367	South Africa	Nahoon Point	East Beach	-33.0225	27.9311	Terrestrial Limiting	The datapoint is a marine or terrestrial limiting indicator	6	0.1	6	0.1	Luminescence	NHN2	001	OSL	Equal to	115.80	7.50	Equal to	MIS 5	Jacobs and Roberts, 2009	Andrew Cooper
368	South Africa	Sodwana Bay	Two Mile Reef	-27.5078	32.6975	Sea Level Indicator	Beach deposit or beachrock	-17	2	-17	2.06	U-Series	PTA-U435	001	beachrock	Equal to	84	3	Equal to	MIS 5	Ramsay, 1994	Andrew Cooper
369	South Africa	Sodwana Bay	Two Mile Reef 2	-27.5078	32.6974	Sea Level Indicator	Beach deposit or beachrock	-44	2	-44	2.06	U-Series	PTA-U487	001	beachrock	Equal to	117	7	Equal to	MIS 5	Ramsay, 1994	Andrew Cooper
389	South Africa	Mossel Bay	-34m	-34.0881	22.2611	Terrestrial Limiting	The datapoint is a marine or terrestrial limiting indicator	-34	1	-34	1	Luminescence	HC30	001	OSL	Equal to	142.00	12.00	Equal to		Cawthra 2014	Andrew Cooper
390	South Africa	Mossel Bay	-33m	-34.0908	22.2475	Terrestrial Limiting	The datapoint is a marine or terrestrial limiting indicator	-33	1	-33	1	Luminescence	HC26	001	OSL	Equal to	138	14.00	Equal to		Cawthra 2014	Andrew Cooper
391	South Africa	Mossel Bay	-30m	-34.0838	22.2536	Terrestrial Limiting	The datapoint is a marine or terrestrial limiting indicator	-30	1	-30	1	Luminescence	HC35	001	OSL	Equal to	134.00	13	Equal to		Cawthra 2014	Andrew Cooper
392	South Africa	Mossel Bay	-30m B	-34.0817	22.2575	Terrestrial Limiting	The datapoint is a marine or terrestrial limiting indicator	-30	1	-30	1	Luminescence	HC36	00	OSL	Equal to	125	12.00	Equal to		Cawthra 2014	Andrew Cooper
393	South Africa	Mossel Bay	Shoreline	-34.0647	22.2089	Sea Level Indicator	Foreshore deposits	0	0.1	1	2	Luminescence	HCSH	001	OSL	Equal to	122	15.00	Equal to		Cawthra 2014	Andrew Cooper
394	South Africa	Mossel Bay	-35m	-34.0894	22.2639	Terrestrial Limiting	The datapoint is a marine or terrestrial limiting indicator	-35	1	-35	1	Luminescence	HC29	001	OSL	Equal to	122.00	10.00	Equal to		Cawthra 2014	Andrew Cooper
395	South Africa	Mossel Bay	-26m	-34.0731	22.2622	Sea Level Indicator	Foreshore deposits	-26	1	-25	2.23	Luminescence	HC40	001	OSL	Equal to	117.00	11.00	Equal to		Cawthra 2014	Andrew Cooper
396	South Africa	Mossel Bay	-17m	-34.0689	22.2578	Sea Level Indicator	Foreshore deposits	-17	1	-5.5	8.55	Luminescence	HC32	001	OSL	Equal to	115.00	9.00	Equal to		Cawthra 2014	Andrew Cooper
397	South Africa	Mossel Bay	-25m	-34.0781	22.2536	Sea Level Indicator	Foreshore deposits	-25	1	-24	2.23	Luminescence	HC39	001	OSL	Equal to	103.00	8.00	Equal to		Cawthra 2014	Andrew Cooper
398	South Africa	Mossel Bay	-38m	-34.1025	22.2564	Terrestrial Limiting	The datapoint is a marine or terrestrial limiting indicator	-38	1	-38	1	Luminescence	HC24	001	OSL	Equal to	87.00	9.00	Equal to		Cawthra 2014	Andrew Cooper
399	South Africa	Groot Brak Estuary Mouth	Site A	-34.0564	22.2397	Marine Limiting	Foreshore deposits	3.5	0.05	3.5	0.05	Luminescence	142833	001	OSL	Equal to	116.10	7.30	Equal to		Cawthra et al., 2018	Andrew Cooper
400	South Africa	Groot Brak Estuary Mouth	Site B	-34.0561	22.2406	Marine Limiting	Foreshore deposits	11.1	0.05	11.1	0.05	Luminescence	142832	001	OSL	Equal to	119.70	8.90	Equal to		Cawthra et al., 2018	Andrew Cooper
401	South Africa	Groot Brak Estuary Mouth	Site C	-34.0558	22.2464	Marine Limiting	Foreshore deposits	23.5	0.05	23.5	0.05	Luminescence	157206	001	OSL	Equal to	118.00	8.40	Equal to		Cawthra et al., 2018	Andrew Cooper
402	South Africa	Groot Brak Estuary Mouth	Site C	-34.0558	22.2464	Marine Limiting	Foreshore deposits	20.2	0.05	20.2	0.05	Luminescence	157205	001	OSL	Equal to	123.40	6.90	Equal to	MIS 5	Cawthra et al., 2018	Andrew Cooper
403	South Africa	Groot Brak Estuary Mouth	Site C	-34.0558	22.2464	Marine Limiting	Foreshore deposits	13.3	0.05	13.3	0.05	Luminescence	157204	001	OSL	Equal to	135.40	7.90	Equal to	MIS 5	Cawthra et al., 2018	Andrew Cooper
404	South Africa	Groot Brak Estuary Mouth	Site C	-34.0558	22.2464	Marine Limiting	Foreshore deposits	10.4	0.05	10.4	0.05	Luminescence	157203	001	OSL	Equal to	128.40	9.20	Equal to	MIS 5	Cawthra et al., 2018	Andrew Cooper
405	South Africa	Groot Brak Estuary Mouth	Site C	-34.0558	22.2464	Marine Limiting	Foreshore deposits	9.5	0.05	9.5	0.05	Luminescence	157202	001	OSL	Equal to	128.10	8.40	Equal to	MIS 5	Cawthra et al., 2018	Andrew Cooper
406	South Africa	Groot Brak Estuary Mouth	Site C	-34.0558	22.2464	Marine Limiting	Foreshore deposits	6	0.05	6	0.05	Luminescence	142829	001	OSL	Equal to	111.20	7.50	Equal to		Cawthra et al., 2018	Andrew Cooper
407	South Africa	Groot Brak Estuary Mouth	Site B	-34.0561	22.2406	Sea Level Indicator	Foreshore deposits	9	0.05	10	2	Luminescence	142831	001	OSL	Equal to	124.30	8.60	Equal to		Cawthra et al., 2018	Andrew Cooper
	South Africa	Groot Brak Estuary Mouth	Site B	-34.0561	22.2406	Sea Level Indicator	Foreshore deposits	9	0.05	10	2	Luminescence	142830	001	OSL	Equal to	116.30	9.20	Equal to		Cawthra et al., 2018	Andrew Cooper
408	South Africa	Langebaan	Hominid footprint site	-33.1528	18.0383	Sea Level Indicator	Lagoonal deposit	1.3	0.1	1.3	1	U-Series	RB97-04	001	Dune	Equal to	103	7	Equal to	MIS 5	Roberts and Berger 1997	Andrew Cooper
	South Africa	Langebaan	Hominid footprint site	-33.1528	18.0383	Sea Level Indicator	Lagoonal deposit	1.3	0.1	1.3	1	U-Series	RB97-05	001	Carbonate in Aeolianite	Equal to	102	7	Equal to	MIS 5	Roberts and Berger 1997	Andrew Cooper
	South Africa	Langebaan	Hominid footprint site	-33.1528	18.0383	Sea Level Indicator	Lagoonal deposit	1.3	0.1	1.3	1	Luminescence	RB97-01	001	IRSL	Equal to	118.00	18.00	Equal to		Roberts and Berger 1997	Andrew Cooper
	South Africa	Langebaan	Hominid footprint site	-33.1528	18.0383	Sea Level Indicator	Lagoonal deposit	1.3	0.1	1.3	1	Luminescence	RB97-02	001	TL	Equal to	228.00	25.00	Equal to		Roberts and Berger 1997	Andrew Cooper
	South Africa	Langebaan	Hominid footprint site	-33.1528	18.0383	Sea Level Indicator	Lagoonal deposit	1.3	0.1	1.3	1	Luminescence	RB97-03	001	IRSL	Equal to	107.00	7.00	Equal to		Roberts and Berger 1997	Andrew Cooper
412	South Africa	Durban Bluff	Reunion Rocks	-29.9844	30.9655	Terrestrial Limiting	The datapoint is a marine or terrestrial limiting indicator	6	1	6	1	U-Series	PTA-U415	001	Elephant Tusk	Older than	112	23	Equal to	MIS 5	Ramsay et al. 1993	Andrew Cooper
414	South Africa	Coffee Bay		-31.9876	29.1521	Sea Level Indicator	Shore platform	4.5	1	2	2.69	U-Series	PTA-U568	001	Oyster in beach	Equal to	104	9	Equal to	MIS 5	Ramsay and Cooper, 2002	Andrew Cooper
415	South Africa	Phinda Game Reserve		-27.8782	32.3299	Sea Level Indicator	Shore platform	4	0.1	3	0.1	U-Series	PTA-U565	001	Oyster	Equal to	95.7	4	Equal to	MIS 5	Ramsay and Cooper, 2002; MR Cooper, 1999	Andrew Cooper
417	South Africa	Isipingo		-29.9984	30.9489	Sea Level Indicator	Beach swash deposit	6	1	4.5	1.11	Stratigraphic constraint	Isipingo Formation on Durban Bluff			Younger than	no date		Equal to	MIS 7	Porat and Botha, 2008; Cooper and Flores, 1991	Andrew Cooper
418	South Africa	Isipingo		-29.9984	30.9489	Sea Level Indicator	Shore platform	5	1	5	1.11	Stratigraphic constraint	Isipingo Formation on Durban Bluff			Younger than	no date		Equal to	MIS 7	Porat and Botha, 2008; Cooper and Flores, 1991	Andrew Cooper
420	South Africa	Umdloti		-29.6667	31.1223	Sea Level Indicator	Shore platform	4	0.1	4	0.1	Stratigraphic constraint	Isipingo Formation on Durban Bluff			Younger than	no date		Equal to	MIS 7	Porat and Botha, 2008; Cooper and Green, 2016	Andrew Cooper
422	South Africa	Aliwal Shoal		-30.25	30.8167	Terrestrial Limiting	The datapoint is a marine or terrestrial limiting indicator	-15	1	-15	1	U-Series	GC-4	001	Aeolianite	Equal to	121.78	6.6	Equal to	MIS 5	Bosman, 2012	Andrew Cooper
	South Africa	Aliwal Shoal		-30.25	30.8167	Terrestrial Limiting	The datapoint is a marine or terrestrial limiting indicator	-15	1	-15	1	Luminescence	GC-4	001	OSL	Equal to	127.00	7.00	Equal to		Bosman, 2012	Andrew Cooper
423	South Africa	Aliwal Shoal		-30.25	30.8167	Terrestrial Limiting	The datapoint is a marine or terrestrial limiting indicator	-16	1	-16	1	U-Series	GC-7	001	Aeolianite	Equal to	90.53	2.6	Equal to	MIS 5	Bosman, 2012	Andrew Cooper
	South Africa	Aliwal Shoal		-30.25	30.8167	Terrestrial Limiting	The datapoint is a marine or terrestrial limiting indicator	-16	1	-16	1	Luminescence	GC-7	001	OSL	Equal to	93.00	6.00	Equal to		Bosman, 2012	Andrew Cooper
444	South Africa	Swartkops Estuary Mouth	Deal Party	-33.8711	25.6231	Sea Level Indicator	Estuary deposit	8	1	6.7	2	AAR	PE-557	001	Estuarine mollusc	Equal to	130		Equal to	MIS 5	Davies, 1980	Andrew Cooper

## Sheet: Angola
370	Angola	Benguela	Near Site Benguela A (Walker et al. 2016)	-12.6203	13.2436	Sea Level Indicator	Lagoonal deposit	11	1	11.5	1.8	U-Series	AN57-1	001	Mollusk or algae	Equal to		N/A		MIS 5	Giresse et al., 1984	Andrew Cooper
371	Angola	Benguela	Near Site Benguela A (Walker et al. 2016)	-12.6203	13.2436	Sea Level Indicator	Lagoonal deposit	11	1	11.5	1.8	U-Series	AN57-2	001	Mollusk or algae	Equal to		N/A	Equal to	MIS 5	Giresse et al., 1984	Andrew Cooper
372	Angola	Mossamedes		-15.1331	12.1547	Sea Level Indicator	Beach deposit or beachrock	15	1	15	2.23	U-Series	AN40-2	001	Mollusk or algae	Equal to		N/A	Equal to	MIS 5	Giresse et al., 1984	Andrew Cooper
373	Angola	Benguela	Benguela A	-12.61	13.365	Sea Level Indicator	Lagoonal deposit	25	1	25.5	1.8	Luminescence	BNG10-6	001	OSL	Equal to	57.80	11.20	Equal to	MIS 3	Walker et al., 2016	Andrew Cooper
	Angola	Benguela	Benguela A	-12.61	13.365	Sea Level Indicator	Lagoonal deposit	25	1	25.5	1.8	Luminescence	BNG10-7	001	OSL	Equal to	36.80	3.40	Equal to	MIS 3	Walker et al., 2016	Andrew Cooper
	Angola	Benguela	Benguela A	-12.61	13.365	Sea Level Indicator	Lagoonal deposit	25	1	25.5	1.8	Luminescence	BNG10-8	001	OSL	Equal to	47.00	5.90	Equal to	MIS 3	Walker et al., 2016	Andrew Cooper
	Angola	Benguela	Benguela A	-12.61	13.365	Sea Level Indicator	Lagoonal deposit	25	1	25.5	1.8	Luminescence	BNG10-9	001	OSL	Equal to	53.90	6.20	Equal to		Walker et al., 2016	Andrew Cooper
377	Angola	Benguela	Site B	-12.5508	13.4397	Sea Level Indicator	Lagoonal deposit	25	1	25.5	1.8	Luminescence	BNG10-10	001	OSL	Equal to	42.50	3.70	Equal to		Walker et al., 2016	Andrew Cooper
	Angola	Benguela	Site B	-12.5508	13.4397	Sea Level Indicator	Lagoonal deposit	25	1	25.5	1.8	Luminescence	BNG10-11	001	OSL	Equal to	46.80	7.90	Equal to		Walker et al., 2016	Andrew Cooper
379	Angola	Benguela	Site C	-12.5442	13.4639	Sea Level Indicator	Lagoonal deposit	25	1	25.5	1.8	Luminescence	BNG10-12	001	OSL	Equal to	44.70	5.60	Equal to		Walker et al., 2016	Andrew Cooper
